# Supplementary material for: Participant Experiences in a Human Biomonitoring Study: Follow-Up Interviews with Participants of the Flemish Environment and Health Study
Source: Toxics. 2021 Mar 28;9(4):69. doi: 10.3390/toxics9040069 (PMC8066005; doi:10.3390/toxics9040069)
Supplement: Supplementary file 1 [file toxics-09-00069-s001.zip]

Archive with 4 entries (4 files):
- toxics-1139747 - supplem 3.pdf
- toxics-1139747 - supplem 4.pdf
- toxics-1139747 - supplem 1.pdf
- toxics-1139747 - supplem 2.pdf
